# Supplementary material for: First tetrazole-bridged d–f heterometallic MOFs with a large magnetic entropy change
Source: Royal Society of Chemistry journal article supplement (doi:10.1039/c5cc03670d), 2015-01-01
Supplement: c5cc03670d1.pdf [file c5cc03670d1.pdf]

## Electronic Supplementary Information (ESI)

### **First tetrazole-bridged d-f heterometallic MOFs with large magnetic entropy change**

Huan-Cheng Hu, Xiao-Min Kang, Chun-Shuai Cao, Peng Cheng, Bin Zhao\*

#### **General Materials and Measurements**

All raw materials were purchased commercially at analytical grade and used without further purification. C, N and H microanalysis were measured on a Perkin-Elmer elemental analyzer. Powder X-ray diffraction (PXRD) data were recorded on a Rigaku D/Max-2500 diffractometer at room temperature using  $\text{Cu}_{K\alpha}$  radiation ( $\lambda = 1.5406 \text{ \AA}$ ). Inductively Coupled Plasma (ICP) data were collected on a USA Thermo Jarrell-Ash Corp ICP-9000 (N+M) spectrometer. Thermogravimetric analysis (TGA) was performed from a Netzsch TG 209 TG-DTA analyzer in the temperature range of 30-800 °C with a ramp rate of 10 °C  $\text{min}^{-1}$  under  $\text{N}_2$  atmosphere. Magnetic properties were measured on PPMS ACMS and Quantum Design SQUID VSM magnetometers.

#### **Synthesis of $\{(\text{H}_3\text{O})_3[\text{Gd}_3\text{Mn}_2(\text{Trz})_4] \cdot 12\text{H}_2\text{O}\}_n$ (**1**)**

A mixture of  $\text{GdCl}_3 \cdot 6\text{H}_2\text{O}$  (0.15 mmol, 0.0558 g),  $\text{MnCl}_2 \cdot 4\text{H}_2\text{O}$  (0.15 mmol, 0.0295 g),  $\text{KC}_4\text{N}_3$  (0.05 mmol, 0.0065 g),  $\text{NH}_4\text{F}$  (0.3 mmol, 0.0111 g),  $\text{NaN}_3$  (0.6 mmol, 0.039 g),  $\text{H}_2\text{O}$  (6 mL) and MeOH (2 mL) were sealed in a 25 mL Teflon-lined bomb and heated in an oven at 145 °C for three days, and then cooled to room temperature within four days. Colorless polyhedral crystals of **1** were separated by filtration and washed with MeOH. Yield: ca. 20%. Anal. calcd (%) for  $\text{Gd}_3\text{Mn}_2\text{C}_{16}\text{N}_{48}\text{O}_{19}\text{H}_{33}$  (1783.37): C, 10.78; N, 37.70; H, 1.86; found (%): C, 10.83; N, 37.62; H, 1.82.

Additionally, for the chemical formula of **1**, due to the high symmetry, it is difficult to determine the assignment of proton. The extra proton may be in the form of  $\text{H}_3\text{O}^+$ , or be attached to tetrazole N atom from the ligand. Therefore, herein one of the chemical formulas is given.

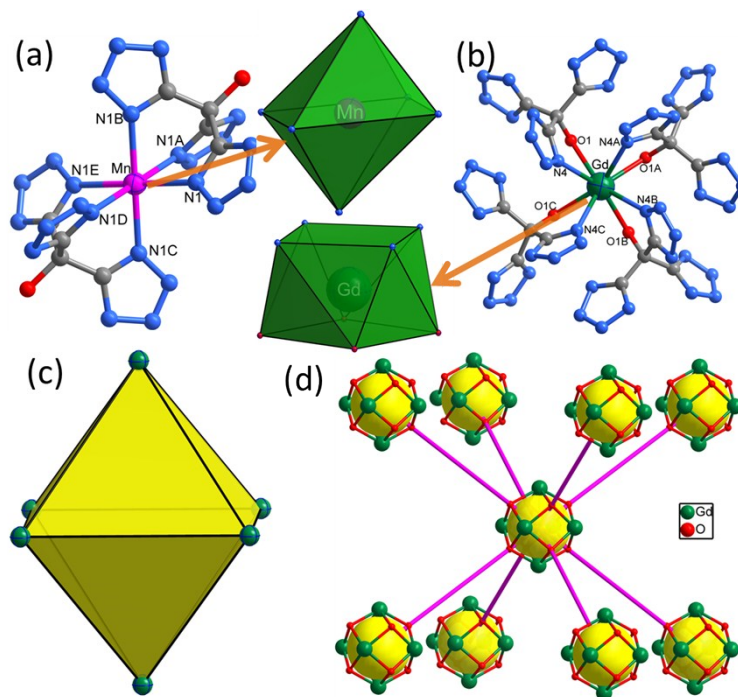

**Fig. S1** (a) The coordination environments and geometrical configuration of  $\text{Mn}^{2+}$  ion and (b)  $\text{Gd}^{3+}$  ion for compound **1**; (c) Octahedral skeleton for six  $\text{Gd}^{\text{III}}$  ions in each  $\{\text{Gd}_6\text{O}_8\}$  cluster; (d) The  $\{\text{Gd}_6\text{O}_8\}$  cluster represented as an eight-connected node.

### Thermogravimetric Analysis (TGA)

To investigate the thermal stability of compound **1**, thermogravimetric analysis (TGA) curve of **1** were recorded, the 14.2% weight loss in the range of room temperature to 305 °C may be attributed to the removal of solvent water molecules and restrained water molecules from  $\text{H}_3\text{O}^+$  ions (calc:15.1 %).

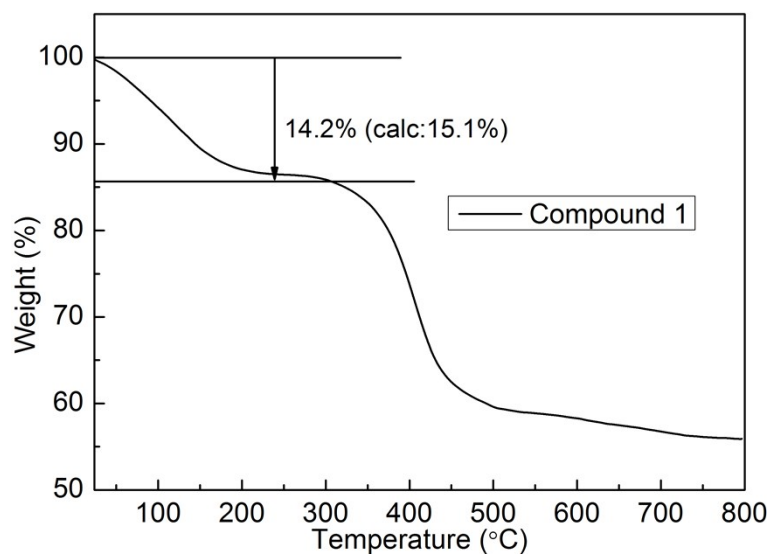

**Fig. S2** TGA curve of **1**

### Powder X-ray Diffraction (PXRD)

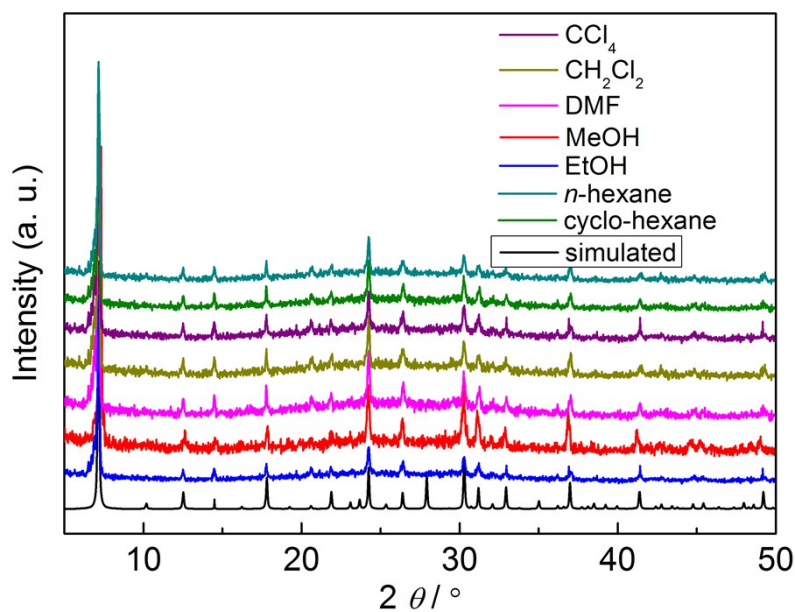

**Fig. S3** The powder X-ray diffraction patterns of compound **1** in different organic solvents.

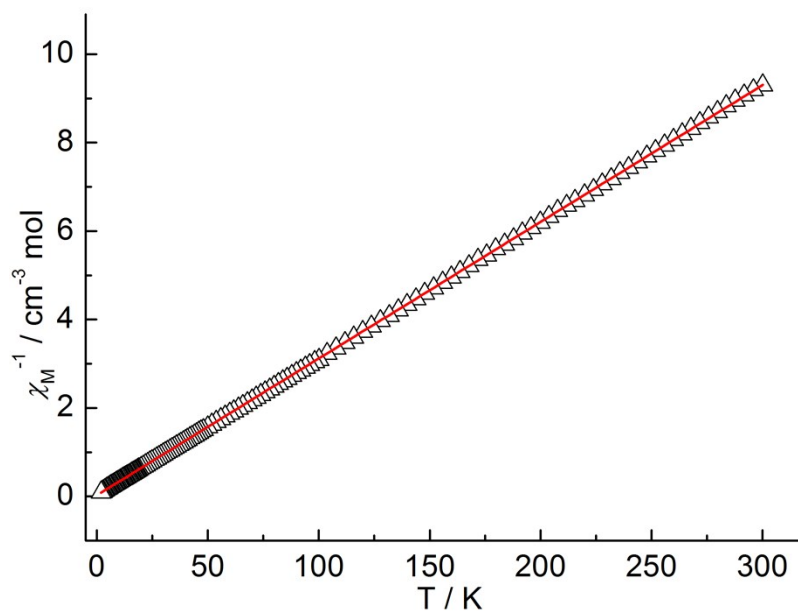

**Fig. S4** Temperature dependence of  $\chi_M^{-1}$  for compound **1** in applied field of 1000 Oe from 2 to 300K. The solid line is the best fit according to the Curie-Weiss law.

## Crystallography Information

**Table S1** Crystal data and structure refinement for **1**

|                                                                   |                                                                                                   |
|-------------------------------------------------------------------|---------------------------------------------------------------------------------------------------|
| Empirical formula                                                 | Gd <sub>3</sub> Mn <sub>2</sub> C <sub>16</sub> N <sub>48</sub> O <sub>19</sub> H <sub>33</sub>   |
| Formula weight                                                    | 1783.37                                                                                           |
| Temperature/K                                                     | 130.80(14)                                                                                        |
| Crystal system                                                    | cubic                                                                                             |
| Space group                                                       | Pn-3n                                                                                             |
| a/Å                                                               | 17.1065(12)                                                                                       |
| b/Å                                                               | 17.1065(12)                                                                                       |
| c/Å                                                               | 17.1065(12)                                                                                       |
| α/°                                                               | 90.00                                                                                             |
| β/°                                                               | 90.00                                                                                             |
| γ/°                                                               | 90.00                                                                                             |
| Volume/Å <sup>3</sup>                                             | 5005.9(6)                                                                                         |
| Z                                                                 | 4                                                                                                 |
| ρ <sub>calc</sub> mg/mm <sup>3</sup>                              | 2.291                                                                                             |
| m/mm <sup>-1</sup>                                                | 4.523                                                                                             |
| F(000)                                                            | 3304.0                                                                                            |
| Radiation                                                         | Mo Kα (λ = 0.71073)                                                                               |
| 2θ range for data collection                                      | 5.84 to 50°                                                                                       |
| Index ranges                                                      | -12 ≤ h ≤ 7, -10 ≤ k ≤ 20, -19 ≤ l ≤ 12                                                           |
| Reflections collected                                             | 4051                                                                                              |
| Independent reflections                                           | 753 [R <sub>int</sub> = 0.0864, R <sub>sigma</sub> = 0.0761]                                      |
| Goodness-of-fit on F <sup>2</sup>                                 | 1.070                                                                                             |
| Final R indexes [I ≥ 2σ (I)]                                      | R <sub>1</sub> = 0.0550, wR <sub>2</sub> = 0.1571                                                 |
| Final R indexes [all data]                                        | R <sub>1</sub> = 0.0937, wR <sub>2</sub> = 0.1824                                                 |
| <sup>a</sup> R <sub>1</sub> = $\sum   F_o  -  F_c   / \sum  F_o $ | <sup>b</sup> wR <sub>2</sub> = $\left[ \frac{\sum w(F_o^2 - F_c^2)^2}{\sum wF_o^4} \right]^{1/2}$ |

**Table S2** Inductively Coupled Plasma (ICP) analyses for Na<sup>+</sup> and K<sup>+</sup> in **1** and blank, respectively.

| sample       | Na <sup>+</sup> (mg/L) | K <sup>+</sup> (mg/L) |
|--------------|------------------------|-----------------------|
| <b>blank</b> | 1.01                   | 0.22                  |
| <b>1</b>     | 1.05                   | 0.26                  |

Blank: The solution of 10 mL water and 200 uL hydrochloric acid.

**1**: 5 mg sample **1** was dissolved in 200 uL hydrochloric acid, and then 10 mL water was added to form the solution.

**Table S3** Summary of the value of  $-\Delta S_m$  for more than 60 reported 3d-4f molecule-based magnetic coolants

| Compounds                                                                                                                                                                                                                                                                                                                    | $-\Delta S_m$ (J kg <sup>-1</sup> K <sup>-1</sup> ) | $\Delta H$ (T) | $T$ (K)  | Ref. |
|------------------------------------------------------------------------------------------------------------------------------------------------------------------------------------------------------------------------------------------------------------------------------------------------------------------------------|-----------------------------------------------------|----------------|----------|------|
| [Mn(H <sub>2</sub> O) <sub>6</sub> ][MnGd(oda) <sub>3</sub> ] <sub>2</sub> ·6H <sub>2</sub> O                                                                                                                                                                                                                                | 50.1                                                | 7              | 1.8      | 1    |
| [Gd <sub>42</sub> Co <sub>9</sub> <sup>II</sup> Co <sup>III</sup> (μ <sub>3</sub> -OH) <sub>68</sub> (CO <sub>3</sub> ) <sub>12</sub> (CH <sub>3</sub> COO) <sub>30</sub> (H <sub>2</sub> O) <sub>70</sub> ]·(ClO <sub>4</sub> ) <sub>25</sub> ·(CH <sub>3</sub> CH <sub>2</sub> OH) <sub><i>n</i></sub> ·70H <sub>2</sub> O | 41.3                                                | 7              | 2        | 2    |
| <b>{(H<sub>3</sub>O)<sub>3</sub>[Gd<sub>3</sub>Mn<sub>2</sub>(Trz)<sub>4</sub>]·12H<sub>2</sub>O}<sub><i>n</i></sub> (this work)</b>                                                                                                                                                                                         | <b>40.3</b>                                         | <b>7</b>       | <b>2</b> |      |
| [{CrF <sub>3</sub> (Me <sub>3</sub> tacn)} <sub>2</sub> Gd <sub>3</sub> F <sub>2</sub> (NO <sub>3</sub> ) <sub>7</sub> (H <sub>2</sub> O)(CH <sub>3</sub> CN)]·4CH <sub>3</sub> CN                                                                                                                                           | 38.3                                                | 7              | 2        | 3    |
| [Gd <sub>42</sub> Ni <sup>II</sup> <sub>10</sub> (μ <sub>3</sub> -OH) <sub>68</sub> (CO <sub>3</sub> ) <sub>12</sub> (CH <sub>3</sub> COO) <sub>30</sub> (H <sub>2</sub> O) <sub>70</sub> ]·(ClO <sub>4</sub> ) <sub>24</sub> ·80H <sub>2</sub> O                                                                            | 38.2                                                | 7              | 2        | 2    |
| [Gd <sub>36</sub> Ni <sub>12</sub> (CH <sub>3</sub> COO) <sub>18</sub> (μ <sub>3</sub> -OH) <sub>84</sub> (μ <sub>4</sub> -O) <sub>6</sub> (H <sub>2</sub> O) <sub>54</sub> (NO <sub>3</sub> )Cl <sub>2</sub> ](NO <sub>3</sub> ) <sub>6</sub> Cl <sub>9</sub> ·30H <sub>2</sub> O                                           | 36.3                                                | 7              | 3        | 4    |
| [Cu <sup>II</sup> <sub>2</sub> Gd <sup>III</sup> <sub>7</sub> (OH) <sub>10</sub> (teaH) <sub>2</sub> (teaH <sub>3</sub> ) <sub>2</sub> (O <sub>2</sub> CPh) <sub>6</sub> (MeOH) <sub>3</sub> (H <sub>2</sub> O) <sub>3</sub> ](Cl) <sub>5</sub> ·6H <sub>2</sub> O                                                           | 34.6                                                | 9              | 2.7      | 5    |
| [Ni <sub>2</sub> Gd <sub>2</sub> (hmp) <sub>4</sub> (OAc) <sub>6</sub> ]                                                                                                                                                                                                                                                     | 34.4                                                | 7              | 4.5      | 6    |
| [Mn <sup>II</sup> <sub>4</sub> Gd <sup>III</sup> <sub>6</sub> (O <sub>3</sub> PCH <sub>2</sub> Ph) <sub>6</sub> (HO <sub>2</sub> C <sup>t</sup> Bu) <sub>13</sub> (O <sub>2</sub> CMe)(HO <sub>2</sub> C <sup>t</sup> Bu)(OH <sub>2</sub> ) <sub>2</sub> (MeCN) <sub>2</sub> ](MeCN) <sub>3</sub>                            | 33.7                                                | 7              | 3        | 7    |
| [{FeF <sub>3</sub> (Me <sub>3</sub> tacn)} <sub>2</sub> Gd <sub>3</sub> F <sub>2</sub> (NO <sub>3</sub> ) <sub>7</sub> (H <sub>2</sub> O)(CH <sub>3</sub> CN)]·4CH <sub>3</sub> CN                                                                                                                                           | 33.1                                                | 7              | 4.2      | 3    |
| [Co <sup>II</sup> <sub>6</sub> Gd <sup>III</sup> <sub>8</sub> (μ <sub>3</sub> -OH) <sub>8</sub> (O <sub>3</sub> PtBu) <sub>6</sub> (O <sub>2</sub> C <sup>t</sup> Bu) <sub>16</sub> (H <sub>2</sub> O) <sub>2</sub> ](MeCN) <sub>2</sub>                                                                                     | 33.0                                                | 14             | 4        | 8    |
| [Cu <sup>II</sup> <sub>4</sub> Gd <sup>III</sup> <sub>12</sub> (OH) <sub>20</sub> (teaH) <sub>2</sub> (teaH <sub>2</sub> ) <sub>4</sub> (O <sub>2</sub> CPh-2-Ph) <sub>8</sub> (H <sub>2</sub> O) <sub>6</sub> Cl <sub>2</sub> ](Cl) <sub>6</sub> ·2MeOH·4H <sub>2</sub> O                                                   | 33.0                                                | 9              | 2.9      | 5    |
| [Co <sub>4</sub> Gd <sub>10</sub> (O <sub>2</sub> C <sup>t</sup> Bu) <sub>12</sub> (O <sub>3</sub> PC <sub>6</sub> H <sub>10</sub> NH <sub>2</sub> ) <sub>8</sub> (PO <sub>4</sub> ) <sub>2</sub> (O <sub>2</sub> CMe) <sub>2</sub> (O <sub>3</sub> PC <sub>6</sub> H <sub>10</sub> NH <sub>3</sub> ) <sub>2</sub> ]         | 32.6                                                | 7              | 2        | 9    |
| [Ni <sub>6</sub> Gd <sub>6</sub> (μ <sub>3</sub> -OH) <sub>2</sub> (μ <sub>2</sub> -OAc) <sub>2</sub> (O <sub>3</sub> PR) <sub>6</sub> (O <sub>2</sub> C <sup>t</sup> Bu) <sub>16</sub> ]                                                                                                                                    | 32.0                                                | 7              | 3        | 10   |
| [Gd <sup>III</sup> <sub>3</sub> Fe <sup>III</sup> <sub>2</sub> (μ <sub>5</sub> -O)L <sub>2</sub> (NO <sub>3</sub> ) <sub>5</sub> (H <sub>2</sub> O)(MeOH)]·0.5MeOH                                                                                                                                                           | 31.7                                                | 7              | 3        | 11   |
| [Cu <sup>II</sup> <sub>5</sub> Gd <sup>III</sup> <sub>4</sub> O <sub>2</sub> (OMe) <sub>4</sub> (teaH) <sub>4</sub> (O <sub>2</sub> CC(CH <sub>3</sub> ) <sub>3</sub> ) <sub>2</sub> (NO <sub>3</sub> ) <sub>4</sub> ]·2MeOH·2Et <sub>2</sub> O                                                                              | 31.0                                                | 9              | 3        | 12   |
| {[Gd <sub>5</sub> Zn(BPDC) <sub>3</sub> (H <sub>2</sub> O) <sub>10</sub> (μ <sub>3</sub> -OH) <sub>6</sub> ](CO <sub>3</sub> ) <sub>0.5</sub> (NO <sub>3</sub> ) <sub>4</sub> ·12H <sub>2</sub> O} <sub><i>n</i></sub>                                                                                                       | 30.7                                                | 7              | 3        | 13   |
| [{CrF <sub>3</sub> (Me <sub>3</sub> tame)} <sub>2</sub> Gd <sub>3</sub> (hfac) <sub>6</sub> (μ-F) <sub>3</sub> ]·7CH <sub>3</sub> CN                                                                                                                                                                                         | 28.7                                                | 9              | 2.2      | 14   |
| [Co <sup>II</sup> <sub>6</sub> Gd <sup>III</sup> <sub>8</sub> (μ <sub>3</sub> -OH) <sub>8</sub> (O <sub>3</sub> PtBu) <sub>6</sub> (O <sub>2</sub> C <sup>t</sup> Bu) <sub>16</sub> (H <sub>2</sub> O) <sub>2</sub> ](MeCN) <sub>2</sub>                                                                                     | 28.6                                                | 7              | 3        | 8    |
| [Mn <sup>II</sup> <sub>9</sub> Gd <sup>III</sup> <sub>9</sub> (O <sub>3</sub> PMe) <sub>12</sub> (O <sub>2</sub> C <sup>t</sup> Bu) <sub>18</sub> (L)]                                                                                                                                                                       | 28.0                                                | 7              | 3        | 7    |
| [Ni <sup>II</sup> <sub>6</sub> Gd <sup>III</sup> <sub>6</sub> (OH) <sub>2</sub> (O <sub>3</sub> PCH <sub>2</sub> Ph) <sub>6</sub> (O <sub>2</sub> C <sup>t</sup> Bu) <sub>16</sub> (MeCO <sub>2</sub> H) <sub>2</sub> ](MeCN) <sub>4</sub>                                                                                   | 26.5                                                | 7              | 3        | 15   |
| [Co <sub>16</sub> Ln <sub>24</sub> (OH) <sub>50</sub> (pyacac) <sub>16</sub> (NO <sub>3</sub> ) <sub>18</sub> (H <sub>2</sub> O) <sub>12</sub> ][Gd(H <sub>2</sub> O) <sub>8</sub> ] <sub>2</sub> (NO <sub>3</sub> ) <sub>16</sub> (OH) <sub>10</sub> ·20MeOH·60H <sub>2</sub> O                                             | 26.0                                                | 7              | 3.8      | 16   |
| [Gd <sup>III</sup> <sub>2</sub> Cu <sup>II</sup> <sub>2</sub> (OH) <sub>2</sub> (NO <sub>3</sub> ) <sub>2.5</sub> (OAc) <sub>3.5</sub> (L <sup>1</sup> ) <sub>2</sub> ] <sub><i>n</i></sub>                                                                                                                                  | 25.7                                                | 7              | 2.4      | 17   |
| [CuGd(pta) <sub>2</sub> (Hpta)(4,4'-bipy) <sub>0.5</sub> (H <sub>2</sub> O)] <sub><i>n</i></sub>                                                                                                                                                                                                                             | 24.8                                                | 7              | 3        | 18   |
| [Co <sup>II</sup> <sub>4</sub> Gd <sup>III</sup> <sub>6</sub> (O <sub>3</sub> PCH <sub>2</sub> Ph) <sub>6</sub> (O <sub>2</sub> C <sup>t</sup> Bu) <sub>14</sub> (MeCN) <sub>2</sub> ]                                                                                                                                       | 23.6                                                | 7              | 3        | 8    |
| [{(HL)(L)(DMF)Cu <sup>II</sup> Gd <sup>III</sup> (DMF)(H <sub>2</sub> O)] <sub>6</sub> ]·6DMF                                                                                                                                                                                                                                | 23.5                                                | 7              | 2        | 19   |
| [Mn(CH <sub>3</sub> OH)(μ-L)Gd(NO <sub>3</sub> ) <sub>3</sub> ]                                                                                                                                                                                                                                                              | 23.5                                                | 7              | 2.7      | 20   |
| [Cu <sub>15</sub> Gd <sub>7</sub> (OH) <sub>6</sub> (CO <sub>3</sub> ) <sub>4</sub> (O <sub>2</sub> CPh) <sub>19</sub> (pdm) <sub>9</sub> (pdmH <sub>2</sub> ) <sub>3</sub> (H <sub>2</sub> O) <sub>2</sub> ]                                                                                                                | 22.2                                                | 7              | 2.5      | 21   |
| [Gd <sup>III</sup> <sub>4</sub> Ni <sup>II</sup> <sub>8</sub> (OH) <sub>8</sub> (L) <sub>8</sub> (O <sub>2</sub> CR) <sub>8</sub> ](ClO <sub>4</sub> ) <sub>4</sub>                                                                                                                                                          | 22.0                                                | 7              | 3.6      | 22   |
| [Gd <sub>5</sub> Ni <sub>12</sub> (Gly) <sub>12</sub> (IDA) <sub>6</sub> (μ <sub>3</sub> -OH) <sub>9</sub> (H <sub>2</sub> O) <sub>3</sub> ](ClO <sub>4</sub> ) <sub>6</sub> ·11H <sub>2</sub> O                                                                                                                             | 21.8                                                | 7              | 4        | 23   |

|                                                                                                                                                                                                                                                                                      |      |   |     |    |
|--------------------------------------------------------------------------------------------------------------------------------------------------------------------------------------------------------------------------------------------------------------------------------------|------|---|-----|----|
| [Co <sup>II</sup> <sub>8</sub> Ln <sup>III</sup> <sub>8</sub> (μ <sub>3</sub> -OH) <sub>4</sub> (NO <sub>3</sub> ) <sub>4</sub> (O <sub>3</sub> P <sup>t</sup> Bu) <sub>8</sub> (O <sub>2</sub> C <sup>t</sup> Bu) <sub>16</sub> ]                                                   | 21.4 | 7 | 3   | 8  |
| [Gd <sup>III</sup> <sub>9</sub> Cu <sup>II</sup> <sub>8</sub> (NO <sub>3</sub> ) <sub>2</sub> (OH) <sub>10</sub> (L <sup>3</sup> ) <sub>4</sub> (OAc) <sub>18</sub> (H <sub>2</sub> O) <sub>4</sub> ](NO <sub>3</sub> ) <sub>2</sub> (OH) <sub>3</sub> ·<br>22H <sub>2</sub> O·4MeOH | 21.4 | 7 | 2.7 | 17 |
| [Co <sup>II</sup> <sub>8</sub> Gd <sup>III</sup> <sub>4</sub> (O <sub>3</sub> P <sup>t</sup> Bu) <sub>6</sub> (O <sub>2</sub> C <sup>t</sup> Bu) <sub>16</sub> ]                                                                                                                     | 21.1 | 7 | 3   | 8  |
| [Gd <sub>24</sub> Cu <sub>36</sub> (OH) <sub>72</sub> (NO <sub>3</sub> ) <sub>6</sub> (O <sub>2</sub> CPh) <sub>60</sub> (MeOH) <sub>6</sub> (H <sub>2</sub> O) <sub>12</sub> ]<br>(NO <sub>3</sub> ) <sub>6</sub> ·39H <sub>2</sub> O·8MeOH·18MeCN                                  | 21.0 | 7 | 2.1 | 24 |
| [Gd <sup>III</sup> <sub>4</sub> Co <sup>II</sup> (μ <sub>3</sub> -O)(dipp) <sub>6</sub> (DMSO) <sub>6</sub> (MeOH) <sub>2</sub> ]·H <sub>2</sub> O                                                                                                                                   | 20.3 | 7 | 3   | 25 |
| [Co <sup>II</sup> <sub>4</sub> Gd <sup>III</sup> <sub>2</sub> (O <sub>3</sub> P <sup>t</sup> Bu) <sub>2</sub> (O <sub>2</sub> C <sup>t</sup> Bu) <sub>10</sub> (MeCN) <sub>2</sub> ](MeCN) <sub>2</sub>                                                                              | 20.0 | 7 | 3   | 8  |
| [Na <sub>2</sub> Co <sub>6</sub> Gd <sub>4</sub> (μ <sub>3</sub> -OH) <sub>2</sub> (O <sub>2</sub> C <sup>t</sup> Bu) <sub>12</sub> (O <sub>3</sub> PC <sub>6</sub> H <sub>10</sub> NH <sub>2</sub> ) <sub>6</sub> (MeCN) <sub>2</sub> ]                                             | 19.7 | 7 | 2   | 9  |
| [Mn <sup>III</sup> <sub>4</sub> Gd <sup>III</sup> <sub>4</sub> (OH) <sub>4</sub> (L) <sub>4</sub> (NO <sub>3</sub> ) <sub>2</sub> (dmf) <sub>6</sub> (H <sub>2</sub> O) <sub>6</sub> ](OH) <sub>2</sub>                                                                              | 19.0 | 7 | 4   | 26 |
| [Ln <sub>6</sub> Cu <sub>24</sub> (Ala) <sub>12</sub> (FA) <sub>8</sub> (μ <sub>3</sub> -OH) <sub>30</sub> (μ <sub>2</sub> -OH) <sub>6</sub> (H <sub>2</sub> O) <sub>18</sub> ]<br>(ClO <sub>4</sub> ) <sub>10</sub> ·64H <sub>2</sub> O                                             | 18.8 | 5 | 2   | 27 |
| [Gd <sub>2</sub> Ni <sub>2</sub> (NO <sub>3</sub> ) <sub>6</sub> (H <sub>2</sub> O) <sub>1.5</sub> (CH <sub>3</sub> CN) <sub>2</sub> (L) <sub>2</sub> ]·CH <sub>3</sub> CN                                                                                                           | 18.5 | 5 | 3   | 28 |
| [Ni <sub>3</sub> Gd(hmp) <sub>4</sub> (OAc) <sub>5</sub> ]·H <sub>2</sub> O·CH <sub>2</sub> Cl <sub>2</sub>                                                                                                                                                                          | 18.3 | 7 | 5.5 | 29 |
| [Gd <sup>III</sup> <sub>4</sub> Zn <sup>II</sup> <sub>8</sub> (OH) <sub>8</sub> (L) <sub>8</sub> (O <sub>2</sub> CR) <sub>8</sub> ](ClO <sub>4</sub> ) <sub>4</sub>                                                                                                                  | 18.0 | 7 | 2   | 22 |
| [Et <sub>4</sub> N][Gd <sub>2</sub> Ni <sub>6</sub> (val) <sub>12</sub> (MeCN) <sub>6</sub> (H <sub>2</sub> O) <sub>3</sub> ][Gd(NO <sub>3</sub> ) <sub>5</sub> ](ClO <sub>4</sub> ) <sub>5</sub>                                                                                    | 17.6 | 5 | 3   | 30 |
| [Gd <sub>6</sub> Mn <sub>12</sub> O <sub>7</sub> (OH) <sub>10</sub> (OAc) <sub>14</sub> (mpea) <sub>8</sub> ]·13H <sub>2</sub> O·6MeOH                                                                                                                                               | 17.0 | 7 | 7   | 31 |
| [Gd <sub>6</sub> Mn <sub>12</sub> O <sub>9</sub> (OH) <sub>8</sub> (OAc) <sub>10</sub> (mpea) <sub>8</sub> (mp) <sub>2</sub> (MeOH) <sub>2</sub> (H <sub>2</sub> O) <sub>2</sub> ]·<br>17H <sub>2</sub> O·12MeOH                                                                     | 15.8 | 7 | 6   | 31 |
| [Gd <sup>III</sup> <sub>4</sub> Cu <sup>II</sup> <sub>8</sub> (OH) <sub>8</sub> (L) <sub>8</sub> (O <sub>2</sub> CR) <sub>8</sub> ](ClO <sub>4</sub> ) <sub>4</sub>                                                                                                                  | 14.6 | 7 | 5.6 | 22 |
| [Gd <sup>III</sup> <sub>6</sub> Cu <sup>II</sup> <sub>12</sub> (OH) <sub>12</sub> (L <sup>3</sup> ) <sub>6</sub> (NO <sub>3</sub> ) <sub>7</sub> (OAc) <sub>3</sub> (H <sub>2</sub> O) <sub>12</sub> ]<br>(OH) <sub>8</sub> ·19H <sub>2</sub> O·MeCN                                 | 14.0 | 7 | 4.5 | 32 |
| [Ni <sub>2</sub> Gd(L <sup>-</sup> ) <sub>6</sub> ](NO <sub>3</sub> )                                                                                                                                                                                                                | 13.7 | 7 | 4   | 33 |
| [Gd <sup>III</sup> <sub>4</sub> Cu <sup>II</sup> <sub>8</sub> (OH) <sub>8</sub> (Me <sub>3</sub> CCOO) <sub>8</sub> (L <sup>1</sup> ) <sub>8</sub> ](NO <sub>3</sub> ) <sub>2</sub> (OH) <sub>2</sub> ·<br>15H <sub>2</sub> O·3MeCN                                                  | 13.5 | 7 | 4.5 | 17 |
| [Ni <sub>3</sub> Tb(hmp) <sub>4</sub> (OAc) <sub>5</sub> ]·H <sub>2</sub> O·CH <sub>2</sub> Cl <sub>2</sub>                                                                                                                                                                          | 13.5 | 7 | 4.5 | 29 |
| [Mn <sup>II</sup> <sub>6</sub> Dy <sup>III</sup> <sub>6</sub> (μ <sub>3</sub> -OH) <sub>2</sub> (O <sub>3</sub> PCH <sub>2</sub> Ph) <sub>6</sub> (O <sub>2</sub> C <sup>t</sup> Bu) <sub>16</sub> (MeCN) <sub>5</sub>                                                               | 13.0 | 7 | 3   | 7  |
| [Ln <sub>2</sub> Cu <sub>8</sub> (μ <sub>2</sub> -OH) <sub>2</sub> (μ <sub>3</sub> -OH) <sub>2</sub> (ClO <sub>4</sub> ) <sub>2</sub> (HTMHSA) <sub>4</sub> (H <sub>2</sub> O) <sub>10</sub> ]·15H <sub>2</sub> O                                                                    | 12.8 | 7 | 3   | 34 |
| [Co <sub>3</sub> Dy(hmp) <sub>4</sub> (OAc) <sub>5</sub> H <sub>2</sub> O]                                                                                                                                                                                                           | 12.6 | 7 | 5.5 | 35 |
| [Ni <sup>II</sup> <sub>6</sub> Dy <sup>III</sup> <sub>6</sub> (OH) <sub>2</sub> (O <sub>3</sub> PCH <sub>2</sub> Ph) <sub>6</sub> (O <sub>2</sub> C <sup>t</sup> Bu) <sub>16</sub> (MeCO <sub>2</sub> H) <sub>2</sub> ](MeCN) <sub>4</sub>                                           | 12.2 | 7 | 3   | 15 |
| [Cu <sub>6</sub> Gd <sub>2</sub> (L <sup>3-</sup> ) <sub>4</sub> (NO <sub>3</sub> ) <sub>3</sub> (OAc)(CH <sub>3</sub> OH) <sub>6</sub> ]·NO <sub>3</sub> ·OAc·3CH <sub>3</sub> OH·2H <sub>2</sub> O                                                                                 | 11.9 | 7 | 2   | 36 |
| [Ni <sub>2</sub> Gd(LH <sub>3</sub> ) <sub>4</sub> ]·3NO <sub>3</sub> ·3MeOH·H <sub>2</sub> O·CH <sub>3</sub> CN                                                                                                                                                                     | 11.8 | 5 | 4   | 37 |
| [Co <sup>II</sup> <sub>8</sub> Gd <sup>III</sup> <sub>2</sub> (μ <sub>3</sub> -OH) <sub>2</sub> (O <sub>3</sub> PCH <sub>2</sub> Ph) <sub>4</sub> (O <sub>2</sub> C <sup>t</sup> Bu) <sub>12</sub> (HO <sub>2</sub> CMe) <sub>2</sub> ]<br>(MeCN) <sub>6</sub>                       | 11.8 | 7 | 3   | 8  |
| [Ni <sub>3</sub> Dy(hmp) <sub>4</sub> (OAc) <sub>5</sub> ]·H <sub>2</sub> O·CH <sub>2</sub> Cl <sub>2</sub>                                                                                                                                                                          | 11.8 | 7 | 4.5 | 29 |
| [Cr <sub>2</sub> Gd <sub>2</sub> (μ-F) <sub>4</sub> F <sub>2</sub> (py) <sub>6</sub> (hfac) <sub>6</sub> ]                                                                                                                                                                           | 11.4 | 9 | 4.1 | 38 |
| {[Dy <sub>5</sub> Zn(BPDC) <sub>3</sub> (H <sub>2</sub> O) <sub>10</sub> (μ <sub>3</sub> -OH) <sub>6</sub> ](CO <sub>3</sub> ) <sub>0.5</sub> (NO <sub>3</sub> ) <sub>4</sub> ·10H <sub>2</sub> O} <sub>n</sub>                                                                      | 10.8 | 7 | 4   | 13 |
| [Ni <sub>3</sub> Y(hmp) <sub>4</sub> (OAc) <sub>5</sub> ]·H <sub>2</sub> O·CH <sub>2</sub> Cl <sub>2</sub>                                                                                                                                                                           | 10.8 | 7 | 4.5 | 24 |
| [Ni <sub>2</sub> Gd <sub>4</sub> (hfac) <sub>8</sub> (pao) <sub>6</sub> (CH <sub>3</sub> COO) <sub>2</sub> (MeOH)]·H <sub>2</sub> O·MeOH                                                                                                                                             | 10.2 | 5 | 4   | 39 |
| [Dy <sup>III</sup> <sub>3</sub> Fe <sup>III</sup> <sub>2</sub> (μ <sub>5</sub> -O)L <sub>2</sub> (NO <sub>3</sub> ) <sub>5</sub> (H <sub>2</sub> O)(MeOH)]·0.5MeOH                                                                                                                   | 9.8  | 7 | 4   | 11 |
| Mn <sup>III</sup> <sub>3</sub> Mn <sup>IV</sup> O <sub>3</sub> Gd <sub>3</sub> (OH)(piv) <sub>6</sub> (EtO) <sub>3</sub> (EtOH) <sub>3</sub> (Et-sao) <sub>3</sub>                                                                                                                   | 7.4  | 5 | 6   | 40 |
| [Ni <sub>3</sub> Ho(hmp) <sub>4</sub> (OAc) <sub>5</sub> ]·H <sub>2</sub> O·CH <sub>2</sub> Cl <sub>2</sub>                                                                                                                                                                          | 7.3  | 7 | 4.5 | 29 |
| [Gd <sub>2</sub> Cu <sub>6</sub> (Gly) <sub>6</sub> (FA) <sub>3</sub> (μ <sub>3</sub> -OH) <sub>3</sub> (μ <sub>3</sub> -OH <sub>2</sub> ) <sub>3</sub> (H <sub>2</sub> O) <sub>9</sub> ](ClO <sub>4</sub> ) <sub>6</sub> ·15H <sub>2</sub> O                                        | 6.0  | 5 | 2   | 27 |

|                                                                                                                                                                                                                                               |     |   |   |    |
|-----------------------------------------------------------------------------------------------------------------------------------------------------------------------------------------------------------------------------------------------|-----|---|---|----|
| [Gd <sub>2</sub> Cu <sub>6</sub> (Gly) <sub>6</sub> (FA) <sub>3</sub> (μ <sub>3</sub> -OH) <sub>3</sub> (μ <sub>3</sub> -OH <sub>2</sub> ) <sub>3</sub> (H <sub>2</sub> O) <sub>8</sub> ](ClO <sub>4</sub> ) <sub>6</sub> ·10H <sub>2</sub> O | 5.8 | 5 | 2 | 27 |
| [Ni <sup>II</sup> <sub>6</sub> Y <sup>III</sup> <sub>6</sub> (OH) <sub>2</sub> (O <sub>3</sub> PCH <sub>2</sub> Ph) <sub>6</sub> (O <sub>2</sub> C <i>t</i> Bu) <sub>16</sub> (MeCO <sub>2</sub> H) <sub>2</sub> ](MeCN) <sub>4</sub>         | 5.6 | 7 | 3 | 15 |
| Mn <sup>III</sup> <sub>3</sub> Mn <sup>IV</sup> O <sub>3</sub> Dy <sub>3</sub> (OH)(piv) <sub>6</sub> (EtO) <sub>3</sub> (EtOH) <sub>3</sub> (Et-sao) <sub>3</sub>                                                                            | 3.7 | 5 | 6 | 40 |

### Crystal Data Collection and Structure Determination

Suitable single crystal of **1** was mounted on a SuperNova diffractometer equipped with a graphite monochromator Mo-K $\alpha$  radiation source ( $\lambda = 0.71073 \text{ \AA}$ ). The structure was solved using direct methods by SHELXS-97 and refined by full matrix least-squares on F<sup>2</sup> using SHELTL-97 in conjunction with the OLEX2 graphical user interface.<sup>41,42</sup> The anisotropic thermal parameters were refined for all non-hydrogen atoms, and hydrogen atoms were calculated and refined with a riding model.

### References

1. F. S. Guo, Y. C. Chen, J. L. Liu, J. D. Leng, Z. S. Meng, P. Vrabel, M. Orendac and M. L. Tong, *Chem. Commun.*, 2012, **48**, 12219.
2. J. B. Peng, Q. C. Zhang, X. J. Kong, Y. Z. Zheng, Y. P. Ren, L. S. Long, R. B. Huang, L. S. Zheng and Z. P. Zheng, *J. Am. Chem. Soc.*, 2012, **134**, 3314.
3. K. S. Pedersen, G. Lorusso, J. J. Morales, T. Weyhermuller, S. Piligkos, S. K. Singh, D. Larsen, M. Schau-Magnussen, G. Rajaraman, M. Evangelisti and J. Bendix, *Angew. Chem. Int. Ed.*, 2014, **53**, 2394.
4. J. B. Peng, Q. C. Zhang, X. J. Kong, Y. P. Ren, L. S. Long, R. B. Huang, L. S. Zheng and Z. P. Zheng, *Angew. Chem. Int. Ed.*, 2011, **50**, 10649.
5. S. K. Langley, B. Moubaraki, C. Tomasi, M. Evangelisti, E. K. Brechin and K. S. Murray, *Inorg. Chem.*, 2014, **53**, 13154.
6. P. Wang, S. Shannigrahi, N. L. Yakovlev and T. S. A. Hor, *Chem. Asian J.*, 2013, **8**, 2943.
7. Y. Z. Zheng, E. M. Pineda, M. Helliwell and R. E. P. Winpenny, *Chem. Eur. J.*, 2012, **18**, 4161.
8. Y. Z. Zheng, M. Evangelisti, F. Tuna and R. E. P. Winpenny, *J. Am. Chem. Soc.*, 2012, **134**, 1057.
9. E. M. Pineda, F. Tuna, R. G. Pritchard, A. C. Regan, R. E. P. Winpenny and E. J. L. McInnes, *Chem. Commun.*, 2013, **49**, 3522.
10. E. M. Pineda, F. Tuna, Y. Z. Zheng, R. E. P. Winpenny and E. J. L. McInnes, *Inorg. Chem.*, 2013, **52**, 13702.
11. H. Li, W. Shi, Z. Niu, J. M. Zhou, G. Xiong, L. L. Li and P. Cheng, *Dalton Trans.*, 2015, **44**, 468.
12. S. K. Langley, N. F. Chilton, B. Moubaraki, T. Hooper, E. K. Brechin, M. Evangelisti and K. S. Murray, *Chem. Sci.*, 2011, **2**, 1166.
13. P. F. Shi, Y. Z. Zheng, X. Q. Zhao, G. Xiong, B. Zhao, F. F. Wan and P. Cheng, *Chem. Eur. J.*, 2012, **18**, 15086.
14. T. Birk, K. S. Pedersen, C. Aa. Thuesen, T. Weyhermuller, M. Schau-Magnussen, S. Piligkos, H. Weihe, S. Mossin, M. Evangelisti and J. Bendix, *Inorg. Chem.*, 2012, **51**, 5435.
15. Y. Z. Zheng, M. Evangelisti and R. E. P. Winpenny, *Angew. Chem. Int. Ed.*, 2011, **50**, 3692.

16. Z. M. Zhang, L. Y. Pan, W. Q. Lin, J. D. Leng, F. S. Guo, Y. C. Chen, J. L. Liu and M. L. Tong, *Chem. Commun.*, 2013, **49**, 8081.
17. J. L. Liu, W. Q. Lin, Y. C. Chen, S. Gómez-Coca, D. Aravena, E. Ruiz, J. D. Leng and M. L. Tong, *Chem. Eur. J.*, 2013, **19**, 17567.
18. X. H. Miao, S. D. Han, S. J. Liu, X. H. Bu, *Chin. Chem. Lett.*, 2014, **25**, 829.
19. A. S. Dinca, A. Ghirri, A. M. Madalan, M. Affronte and M. Andruh, *Inorg. Chem.*, 2012, **51**, 3935.
20. E. Colacio, J. Ruiz, G. Lorusso, E. K. Brechin and M. Evangelisti, *Chem. Commun.*, 2013, **49**, 3845.
21. D. Dermitzaki, G. Lorusso, C. P. Raptopoulou, V. Psycharis, A. Escuer, M. Evangelisti, S. P. Perlepes and T. C. Stamatatos, *Inorg. Chem.*, 2013, **52**, 10235.
22. T. N. Hooper, J. Schnack, S. Piligkos, M. Evangelisti and E. K. Brechin, *Angew. Chem. Int. Ed.*, 2012, **51**, 4633.
23. Z. Y. Li, J. Zhu, X. Q. Wang, J. Ni, J. J. Zhang, S. Q. Liu and C. Y. Duan, *Dalton Trans.*, 2013, **42**, 5711.
24. D. Leng, J. L. Liu and M. L. Tong, *Chem. Commun.*, 2012, **48**, 5286.
25. S. K. Gupta, A. A. Dar, T. Rajeshkumar, S. Kuppaswamy, S. K. Langley, K. S. Murray, G. Rajaraman and R. Murugavel, *Dalton Trans.*, 2015, **44**, 5961.
26. G. Karotsis, M. Evangelisti, S. J. Dalgarno and E. K. Brechin, *Angew. Chem. Int. Ed.*, 2009, **48**, 9928.
27. Z. Y. Li, Y. X. Wang, J. Zhu, S. Q. Liu, G. Xin, J. J. Zhang, H. Q. Huang and C. Y. Duan, *Cryst. Growth Des.*, 2013, **13**, 3429.
28. C. Meseguer, S. Titos-Padilla, M. M. Hänninen, R. Navarrete, A. J. Mota, M. Evangelisti, J. Ruiz and E. Colacio, *Inorg. Chem.*, 2014, **53**, 12092.
29. P. Wang, S. Shannigrahi, N. L. Yakovlev and T. S. A. Hor, *Dalton Trans.*, 2014, **43**, 182.
30. A. Hosoi, Y. Yukawa, S. Igarashi, S. J. Teat, O. Roubeau, M. Evangelisti, E. Cremades, E. Ruiz, L. A. Barrios and G. Aromí, *Chem. Eur. J.*, 2011, **17**, 8264.
31. J. L. Liu, W. Q. Lin, Y. C. Chen, J. D. Leng, F. S. Guo and M. L. Tong, *Inorg. Chem.*, 2013, **52**, 457.
32. J. L. Liu, Y. C. Chen, Q. W. Li, S. Gómez-Coca, D. Aravena, E. Ruiz, W. Q. Lin, J. D. Leng and M. L. Tong, *Chem. Commun.*, 2013, **49**, 6549.
33. A. Upadhyay, N. Komatireddy, A. Ghirri, F. Tuna, S. K. Langley, A. K. Srivastava, E. C. Sañudo, B. Moubaraki, K. S. Murray, E. J. L. McInnes, M. Affronte and M. Shanmugam, *Dalton Trans.*, 2014, **43**, 259.
34. H. Zhang, G. L. Zhuang, X. J. Kong, Y. P. Ren, L. S. Long, R. B. Huang and L. S. Zheng, *Cryst. Growth Des.*, 2013, **13**, 2493.
35. P. Wang, S. Shannigrahi, N. L. Yakovlev and T. S. A. Hor, *Inorg. Chem.*, 2012, **51**, 12059.
36. S. F. Xue, Y. N. Guo, L. Zhao, H. X. Zhang and J. K. Tang, *Inorg. Chem.*, 2014, **53**, 8165.
37. S. Das, A. Dey, S. Kundu, S. Biswas, A. J. Mota, E. Colacio and V. Chandrasekhar, *Chem. Asian J.*, 2014, **9**, 1876.
38. C. Aa. Thuesen, K. S. Pedersen, M. Schau-Magnussen, M. Evangelisti, J. Vibenholt, S. Piligkos, H. Weihe and J. Bendix, *Dalton Trans.*, 2012, **41**, 11284.
39. C. M. Liu, D. Q. Zhang and D. B. Zhu, *RSC Adv.*, 2014, **4**, 53870.
40. C. M. Liu, D. Q. Zhang and D. B. Zhu, *Dalton Trans.*, 2010, **39**, 11325.



41. G. M. Sheldrick, *Acta Crystallogr., Sect. A: Found. Crystallogr.* 2008, **64**, 112.
42. O. V. Dolomanov, L. J. Bourhis, R. J. Gildea, J. A. K. Howard, H. J. Puschmann, *Appl. Crystallogr.* 2009, **42**, 339.
